# Supplementary material for: Development of a core outcome set for therapeutic clinical trials enrolling dogs with atopic dermatitis (COSCAD’18)
Source: BMC Vet Res. 2018 Aug 16;14:238. doi: 10.1186/s12917-018-1569-y (PMC6097451; doi:10.1186/s12917-018-1569-y)
Supplement: Supplementary file 4 — Example of in-article table with data categorization and possible relevant statistical analyses. (XLSX 32 kb) [file 12917_2018_1569_MOESM4_ESM.xlsx]

## Sheet: All Datasets
	Example of in-article table with data categorization and possible relevant statistical analyses
	PVAS10		BEFORE (DAY 0)					AFTER (DAY X)
	Severity Level	Value Range	ACTIVE		PLACEBO		ACT vs PLA	ACTIVE		PLACEBO		ACT vs PLA
	Normal Dog	0.0 - 1.9	0	0	0	0	1	21	0.42	1	0.02	< 0.0001
	Mild AD	2.0 - 3.5	0	0	2	0.04	0.4949	11	0.22	6	0.12	0.2869
	Moderate AD	3.6 - 5.5	16	0.32	11	0.22	0.3678	15	0.3	21	0.42	0.2976
	Severe AD	5.6 - 10.0	34	0.68	37	0.74	0.6598	3	0.06	22	0.44	0.0001
							Fisher's test, two-tailed					Fisher's test, two-tailed
	CADESI4		BEFORE (DAY 0)					AFTER (DAY X)
	Severity Level	Value Range	ACTIVE		PLACEBO		ACT vs PLA	ACTIVE		PLACEBO		ACT vs PLA
	Normal Dog	0 - 9	0	0	0	0	1	5	0.1	2	0.04	0.436
	Mild AD	10 - 34	5	0.1	3	0.06	0.715	23	0.46	7	0.14	0.0009
	Moderate AD	35 - 59	7	0.14	11	0.22	0.4356	18	0.36	11	0.22	0.1856
	Severe AD	60 - 180	38	0.76	36	0.72	0.82	4	0.08	30	0.6	0.0001
							Fisher's test, two-tailed					Fisher's test, two-tailed
	OGATE		AFTER (DAY X)
	Severity Level	Value	ACTIVE		PLACEBO		ACT vs PLA
	No response	0	4	0.08	23	0.46	0.0001
	Poor response	1	2	0.04	12	0.24	0.0076
	Fair response	2	15	0.3	12	0.24	0.6529
	Good respone	3	19	0.38	3	0.06	0.0002
	Excellent response	4	10	0.2	0	0	0.0012
							Fisher's test, two-tailed
